# Supplementary material for: Mammalian production of an isotopically enriched outer domain of the HIV-1 gp120 glycoprotein for NMR spectroscopy
Source: PubMed Central journal article supplement — J Biomol NMR. 2011 Jun 12;50(3):197–207. doi: 10.1007/s10858-011-9506-4 (PMC3133704; doi:10.1007/s10858-011-9506-4), 2011-06-12
Supplement: 10858_2011_9506_MOESM1_ESM.pdf [file 10858_2011_9506_MOESM1_ESM.pdf]

## **Supplementary Material**

### **Mammalian Production of an Isotopically Enriched Outer Domain of the HIV-1 gp120 Glycoprotein for NMR Spectroscopy**

Mallika Sastry, Ling Xu, Ivelin S. Georgiev, Carole A Bewley,

Gary J. Nabel, and Peter D. Kwong

#### Supplementary Methods

Table S1: Correlations between computed super-peaks and observed M/S peaks for outer domain and green fluorescent protein

Table S2: Mammalian expression systems used to obtain isotopically enriched proteins

Table S3: Isotope masses and abundances used for theoretical estimates of isotope incorporation

Table S4: Surface plasmon resonance analysis of glycosylated proteins

Fig. S1: Growth characteristics of the A549 mammalian cell lines

Fig. S2: Characterization of isotopically enriched GFP produced using the Mammalian expression system

Fig. S3: Plasmid maps for the shuttle vector and adenoviral cosmid

Fig. S4 Sequence of HIV-1 gp120 outer domain

Fig. S5 Outer domain sequence alignment

Fig. S6 Characterization of isotopically enriched HIV-1 gp120

## Supplementary Methods

### MALDI TOF spectrometry

In-gel digestion: Gel bands were transferred to pre-digested tubes and 100  $\mu$ L 0.01M DTT/0.1M Tris, pH 8.5 was added. The tube was placed in a heating block at 55° for 2h. After cooling the tube to room temperature, the liquid was removed and replaced with 100  $\mu$ L 0.03M iodoacetamide/0.1M Tris, pH 8.5. This was allowed to react for 30 min. in the dark after which the liquid was removed and the gel was washed as described below. Gel bands were prepared for digestion by washing twice with 200  $\mu$ L 0.05M Tris, pH 8.5/ 30% acetonitrile for 20 minutes with shaking, and once with 100  $\mu$ L acetonitrile for several minutes until the gel was opaque white. After removing the acetonitrile, the gel pieces were dried for 20-30 min. in a Speed-Vac concentrator. Gels were digested by adding 0.10  $\mu$ L modified trypsin (sequencing grade, Roche Molecular Biochemicals, Indianapolis, IN) in 50  $\mu$ L 0.025M Tris, pH 8.5, or enough volume to completely hydrate the gel. The tubes were placed in a heating block at 32° and left overnight. Peptides were extracted with 2X 50  $\mu$ L 50% acetonitrile/2% TFA and the combined extracts were dried in a Speed-Vac concentrator.

MALDI-MS Analysis: Matrix solution was prepared by making a 10 mg/mL solution of 4-hydroxy- $\alpha$ -cyanocinnamic acid in 50% acetonitrile/ 0.1% TFA and adding two internal standards, angiotensin and ACTH 7-38 peptide, to the matrix solution. The final concentration of standards was 193 fmole/ $\mu$ L angiotensin and 340 fmole/ $\mu$ L ACTH. The dried digest was dissolved in 3  $\mu$ L matrix/standard solution and 0.5  $\mu$ L was spotted onto the sample plate. When the spot was completely dried, it was washed twice with water. MALDI mass spectrometric analysis was performed on the digest using an Applied Biosystems Voyager DE Pro mass spectrometer in the reflector mode.

Quantification of isotope incorporation for  $^{15}\text{N}/^{13}\text{C}$  labeled HIV-1 gp120 outer domain

MALDI TOF mass spectroscopy analysis of the outer domain tryptic digest heptapeptide TIIVQLR expressed in  $^{15}\text{N}/^{13}\text{C}$ -labeled media showed a complex mass pattern with five distinct modes. Isotope incorporation analysis for the double labeled outer domain utilized the estimate of  $^{15}\text{N}$  incorporation in the 81-89% range (see main text). From this subset, distributions for

which the mass of the highest peak matched the mass of one of the five different experimentally-observed modes were included in further analysis. Based on this analysis, the  $^{13}\text{C}$  incorporation resulting in the best correlation ( $R^2=0.3461$ ,  $p<0.0001$ ) was at 84% for  $^{15}\text{N}$  and 84% for  $^{13}\text{C}$ , with a corresponding experimental mode at mass 884.5. The distributions for which the mass of the highest peak matched the 884.5 mode corresponded to a range of  $^{13}\text{C}$  incorporation of 83-87%. Hence, the percentage incorporation of the double labeled OD was estimated to be  $85 \pm 2\%$  for  $^{13}\text{C}$  given a  $85 \pm 4\%$  incorporation for  $^{15}\text{N}$  outer domain.

**Table S1.** Correlations between computed super-peaks and observed M/S peaks for Outer Domain and green fluorescent protein.

| Outer domain*                         |                            | Green Fluorescent Protein#            |                            |
|---------------------------------------|----------------------------|---------------------------------------|----------------------------|
| <sup>15</sup> N Enrichment Levels (%) | R <sup>2</sup> Correlation | <sup>15</sup> N Enrichment Levels (%) | R <sup>2</sup> Correlation |
| 81                                    | 0.729                      | 69                                    | 0.873                      |
| 82                                    | 0.752                      | 70                                    | 0.900                      |
| 83                                    | 0.772                      | 71                                    | 0.921                      |
| 84                                    | 0.789                      | 72                                    | 0.937                      |
| 85                                    | 0.802                      | 73                                    | 0.948                      |
| 86                                    | 0.809                      | 74                                    | 0.952                      |
| 87                                    | 0.812                      | 75                                    | 0.949                      |
| 88                                    | 0.808                      |                                       |                            |
| 89                                    | 0.798                      |                                       |                            |

\*Shown are only <sup>15</sup>N enrichment levels at which the mass of the highest-intensity computed peak matched the mass (852.5) of the highest-intensity M/S peak. The best correlation was observed at an enrichment level of 87%.

#Shown are only <sup>15</sup>N enrichment levels at which the mass of the highest-intensity computed peak matched the mass (1358.6) of the highest-intensity M/S peak. The best correlation was observed at an enrichment level of 74%.

**Table S2.** Mammalian expression systems used to obtain isotopically enriched proteins

| Media                                                                                          | Cell Line                    | <sup>15</sup> N Media | <sup>15</sup> N/ <sup>13</sup> C Media |
|------------------------------------------------------------------------------------------------|------------------------------|-----------------------|----------------------------------------|
| Algal and bacterial mixture of amino acids <sup>1</sup>                                        | Sp2/0                        | 30 mg/L,              | 30 mg/L,                               |
| Algal mixture of amino acids <sup>2</sup>                                                      | CHO                          | 10mg/L*               | 10mg/L*                                |
| Commercial media supplemented by labeled amino acids CIL <sup>3</sup>                          | Mouse Hybridoma cells 1B10.7 | 1.5 mM*               | 1.2 mM*                                |
| CIL Bioexpress 6000 ( <sup>15</sup> N/ <sup>15</sup> N, <sup>13</sup> C GKLQSTVW) <sup>4</sup> | HEK293                       | 2mg/L*                | 2.12mg/L*                              |
| Commercial Media (CIL) (Current work)                                                          | A549/Adenoviral Expression   | 50mg/L                | 43 mg/L                                |

\*Cost of media was not reported

<sup>1</sup> (Hansen et al. 1992)

<sup>2</sup> (Lustbader et al. 1996)

<sup>3</sup> (Shindo et al. 2000)

<sup>4</sup> (Werner et al. 2008)

**Table S3.** Isotope masses and abundances used for theoretical estimates of isotope incorporation<sup>5</sup>

| Element | Isotope         | Mass    | Abundance |
|---------|-----------------|---------|-----------|
| H       | <sup>1</sup> H  | 1.0078  | 100.0     |
|         | <sup>2</sup> H  | 2.0141  | 0.015     |
| C       | <sup>12</sup> C | 12.0000 | 100.0     |
|         | <sup>13</sup> C | 13.0034 | 1.119     |
| N       | <sup>14</sup> N | 14.0031 | 100.0     |
|         | <sup>15</sup> N | 15.0001 | 0.368     |
| O       | <sup>16</sup> O | 15.9949 | 100.0     |
|         | <sup>17</sup> O | 16.9991 | 0.037     |
|         | <sup>18</sup> O | 17.9991 | 0.204     |

<sup>5</sup>(Kubinyi 1991)**Table S4.** Surface Plasmon resonance analysis of glycosylated proteins

|     |                      | R2core gp120            |                         | Glycosylated Outer Domain |                                 |
|-----|----------------------|-------------------------|-------------------------|---------------------------|---------------------------------|
|     |                      | Unlabeled               | Unlabeled               | <sup>15</sup> N           | <sup>15</sup> N <sup>13</sup> C |
| b12 | k <sub>d</sub> (1/s) | 0.01077                 | 0.04198                 | 0.02939                   | 0.03044                         |
|     | K <sub>D</sub> (M)   | 5.42 x 10 <sup>-8</sup> | 4.66 x 10 <sup>-8</sup> | 2.95 x 10 <sup>-8</sup>   | 3.75 x 10 <sup>-8</sup>         |
| b13 | k <sub>d</sub> (1/s) | 0.00075                 | 0.01080                 | 0.02045                   | 0.01.025                        |
|     | K <sub>D</sub> (M)   | 1.35 x 10 <sup>-8</sup> | 7.51 x 10 <sup>-8</sup> | 11.4 x 10 <sup>-8</sup>   | 9.41 x 10 <sup>-8</sup>         |

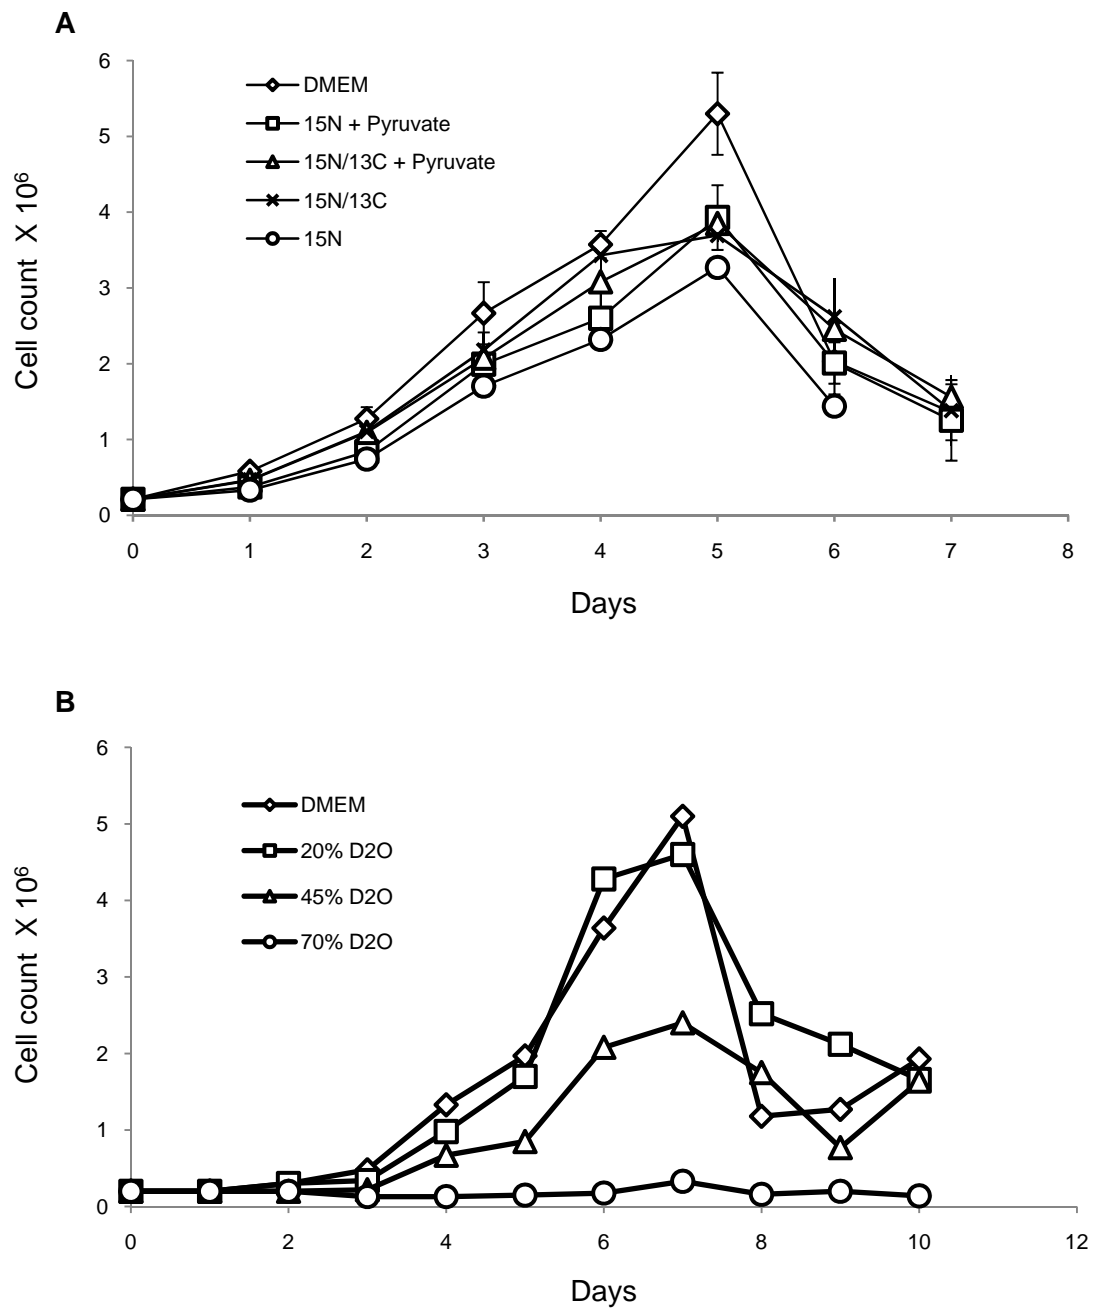

**Fig S1.** Growth characteristics of the A549 mammalian cell line. Growth characteristics of the cell line used to obtain isotopic enrichment was evaluated by obtaining growth curves in different labeled and unlabeled media.

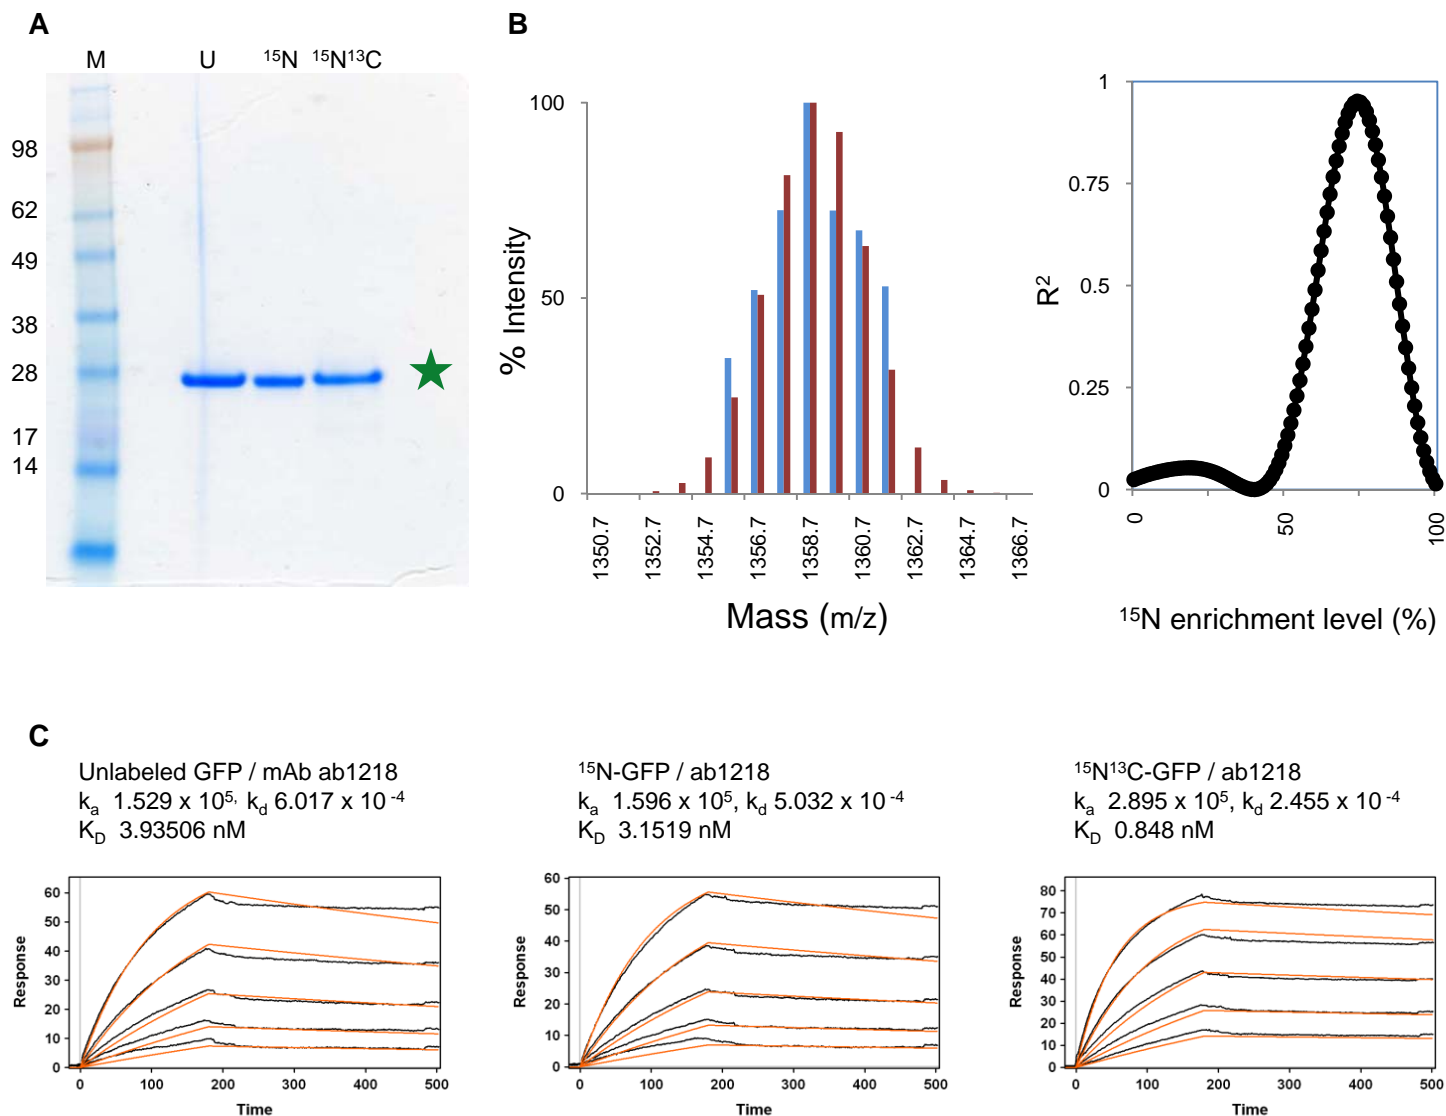

**Fig S2.** Characterization of isotopically enriched GFP expressed using the Mammalian Expression system. Correctly folded GFP can be expressed and purified using the adenoviral expression system. Panel **A**: SDS Page analysis of green GFP. Lanes U,  $^{15}\text{N}$ ,  $^{15}\text{N}^{13}\text{C}$  : unlabeled,  $^{15}\text{N}$ ,  $^{15}\text{N}/^{13}\text{C}$  labeled GFP a ~26 kDa protein that was used for biophysical measurements. Lane M: Molecular weight markers. Panel **B**: Mass spectral analysis of a tryptic peptide TIFFKDDGNYK to determine % incorporation of  $^{15}\text{N}$ . A comparison of experimental and computed pattern for 74 % incorporation of  $^{15}\text{N}$  is shown (left graph). The correlation between observed experimental pattern and computed patterns are shown for each percentage incorporation of  $^{15}\text{N}$  (right graph). Panel **C**: Surface plasmon resonance analysis of unlabeled and  $^{15}\text{N}$ ,  $^{15}\text{N}/^{13}\text{C}$  labeled GFP binding to ab1218 an anti GFP antibody.



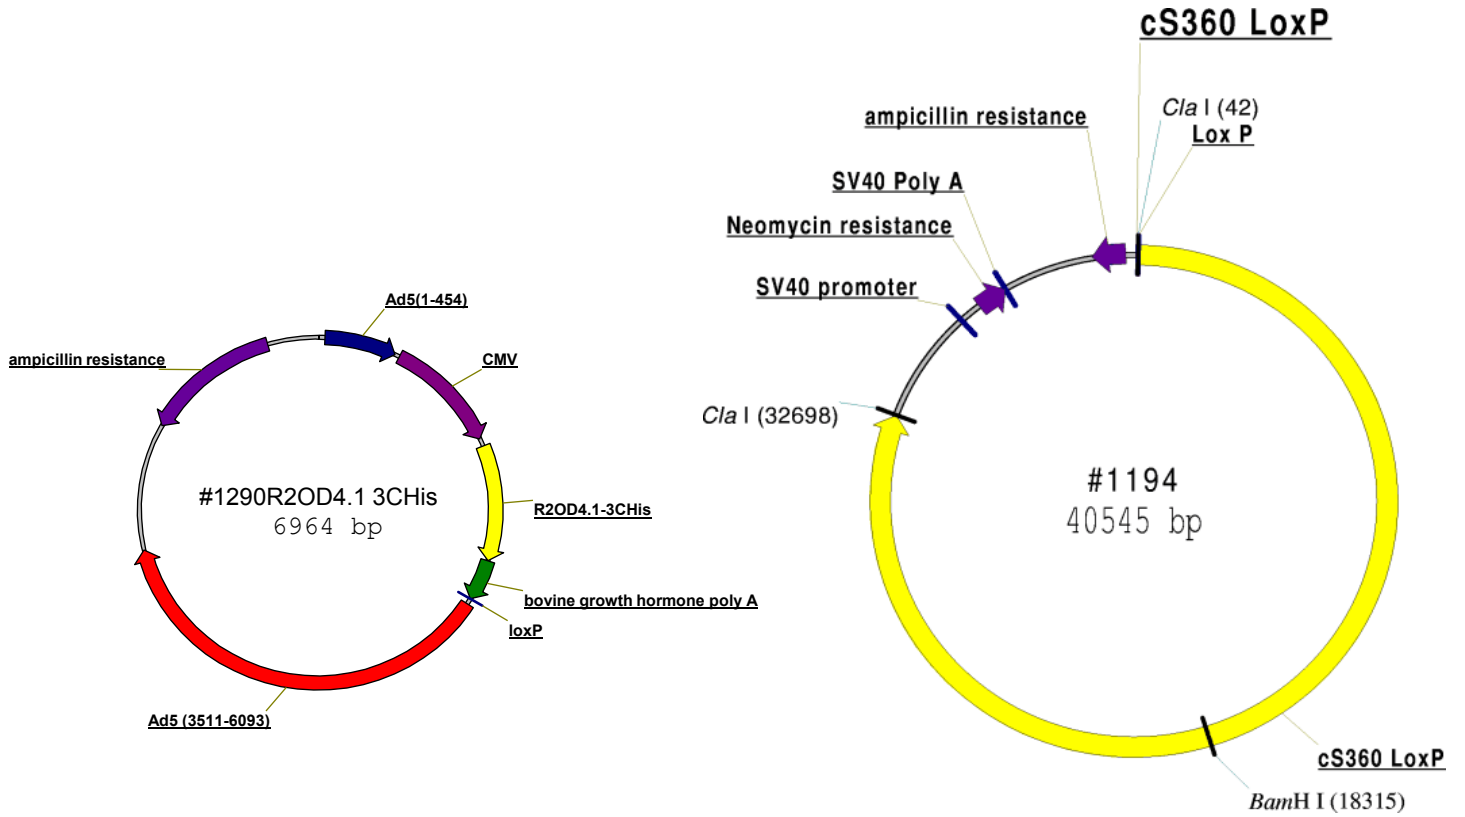

**Fig S3.** Plasmid maps for the shuttle vector (p1290) and the adenoviral cosmid (p1194) used in the cre-lox recombination for adenoviral vector production.

MYSMQLASCVTTLVLLVNSAPRRPVVSTQLLLNGLAEVIRSENFTNCAKTIIVQLRE  
PVKINCSRPNNTNRGRRGDIRQAHCNISKTNWTNALKQVVEKLGGEQFNKTKIVFTQSSGGDP  
EIVTHSFNCAGEFTYCNTTQLFDSIWNSNGTWNITRGLNNTGRNDTITLPCRIRKSGAPPI  
KGNISCSSNITGLLLTRDCGKDDNSRDGNETFRPGGGDMRDNRSEGSLEVLFGPGHHHHH  
H

**Fig S4.** Sequence of HIV-1 gp120 outer domain used in this study. The mouse IL2 leader sequence is shown in red and the C terminal HRV3C cleavage site and the Histidine tag used for purification are shown in green.

```

R2gp120      -MRVKGIRRNYQHWGWTMLLGLLMICSAATEKLWVTVYYGVPVWKEATTTLFCASDAKA  60
R2OD4.1      -----

R2gp120      YDTEAHNVWATHACVPTDPNPQEVELVNVTENFNMWKNNMVEQMHEDIISLWDQSLKPCV  120
R2OD4.1      -----

R2gp120      KLTPLCVTLNCTDLRNTTNTNNSDNNNSNSEGTIKGGEMKNCSFNIAATSIGDKMQKEYA  174
R2OD4.1      -----

R2gp120      LLYKLDIEPIDNDNTSYRLISCNSTSVITQACPKISFEPPIPIHYCAPAGFAILKCNDKKFS  234
R2OD4.1      -----

R2gp120      GKGSKNVSTVQCTHGIRPVVSTQLLLNGSLAEEEVVIRSENFNTNAKTIIVQLREPVKI  294
R2OD4.1      -----RPVVSTQLLLNGSLAEEEVVIRSENFNTCAKTIIVQLREPVKI
                ***** ***: ***** . :*:
                _____ V3 _____
R2gp120      NCSRPNNTRKSI PMGPGRAFYT TQ- IIGDIRQAHCNISKTNWTNALKQVVEKLG EQFN  354
R2OD4.1      NCSRPNNTR-----GRR-----GDIRQAHCNISKTNWTNALKQVVEKLG EQFN
                **:*****      *          *:*****:::*.**:***:..** ***.

R2gp120      KTK-IVFTNSSGGDPEIVTHSFNCAGEFYCNTTQLFDSIWNSENGTWNITRGLNNTGRN  411
R2OD4.1      KTK-IVFTQSSGGDPEIVTHSFNCAGEFTYCNTTQLFDSIWNSENGTWNITRGLNNTGRN
                :.* *:*. :*****.*** ***:***:* * . .** . * *** .

R2gp120      DTITLPCR I QIINRWQEVGKAMYAPPIKGNISCSSNITGLLLTRDGGKDDNSRDGNETF  468
R2OD4.1      DTITLPCR I K-----GSGAPPIKGNISCSSNITGLLLTRDCGKDDNSRDGNETF
                ***** . *****.**:***** * **.:.* *

R2gp120      RPPGGDMRDNRSELYKYKVVKIEPLGVAPTKAKRRVVQREERAVGLGAMFIGFLGAAGS  528
R2OD4.1      RPPGGDMRDNRSE-----
                *****

```

**Fig. S5.** Sequence alignment of full length clade B R2 gp120 and the HIV-1 gp120 outer domain (OD4.1) used in this study (amino acid numbering using HIV-1<sub>HxBc2</sub> gp120 as the standard). Putative glycosylation sites (NXT/S) within the outer domain are highlighted and the V3 loop is shown in red. HIV-1 R2 construct (OD4.1) was designed by deleting  $\beta$ 20/21, the V3 loop along with N362Q, F382T point mutations and an engineered disulfide bond to further stabilize the outer domain.

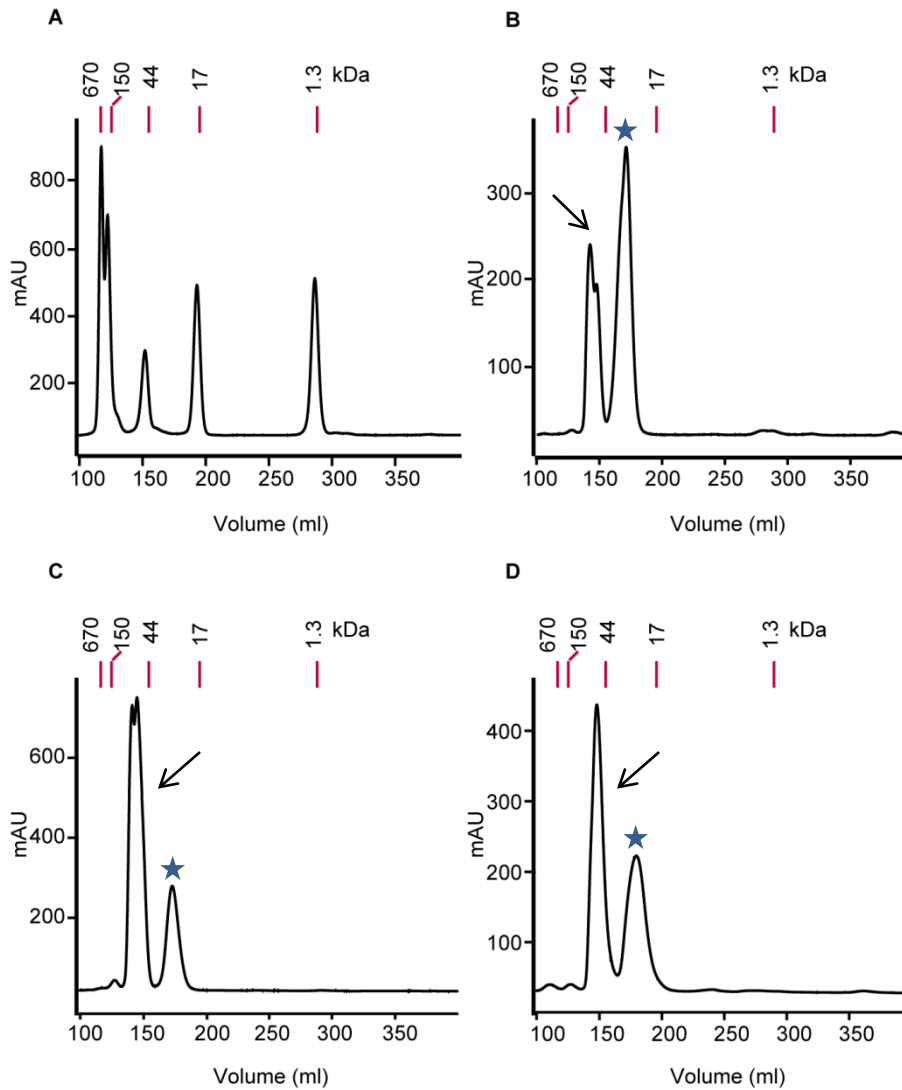

**Fig. S6.** Characterization of isotopically enriched HIV-1 gp120 outer domain expressed using the adenoviral/mammalian expression system by size exclusion chromatography. The deglycosylated HIV-1 gp120 outer domain exhibits elution profile characteristic of a globular monomeric protein. Panel **A**: Protein standards of known molecular weights are labeled on the chromatogram. Panel **B**: Deglycosylated unlabeled HIV-1 gp120 outer domain (★) elutes as a monomer at 171 ml. Panel **C**: Deglycosylated  $^{15}\text{N}$  HIV-1 gp120 outer domain (★) elutes as a monomer at 173 ml. Panel **D**:  $^{15}\text{N}/^{13}\text{C}$  HIV-1 gp120 outer domain (★) also elutes as a monomer at 179 ml. EndoH<sub>f</sub> a recombinant fusion protein of Endoglycosidase H and Maltose binding protein of apparent molecular weight of 79 kDa is marked with an arrow.

## References

- Hansen AP, Petros AM, Mazar AP, Pederson TM, Rueter A, Fesik SW (1992) A practical method for uniform isotopic labeling of recombinant proteins in mammalian cells. *Biochemistry* 31 (51):12713-12718.
- Kubinyi H (1991) Calculation of isotope distributions in mass spectrometry. A trivial solution for a non-trivial problem. *Analytica Chimica Acta* 247 (1):107-119.
- Lustbader JW, Birken S, Pollak S, Pound A, Chait BT, Mirza UA, Ramnarain S, Canfield RE, Brown JM (1996) Expression of human chorionic gonadotropin uniformly labeled with NMR isotopes in Chinese hamster ovary cells: An advance toward rapid determination of glycoprotein structures. *Journal of Biomolecular NMR* 7 (4):295-304.
- Shindo K, Masuda K, Takahashi H, Arata Y, Shimada I (2000) Letter to the Editor: Backbone <sup>1</sup>H, <sup>13</sup>C, and <sup>15</sup>N resonance assignments of the anti-dansyl antibody Fv fragment. *Journal of Biomolecular NMR* 17 (4):357-358.
- Werner K, Richter C, Klein-Seetharaman J, Schwalbe H (2008) Isotope labeling of mammalian GPCRs in HEK293 cells and characterization of the C-terminus of bovine rhodopsin by high resolution liquid NMR spectroscopy. *Journal of Biomolecular NMR* 40 (1):49-53.
